1 **Title: Microscopic and metatranscriptomic analyses revealed unique cross-domain**  
2 **symbiosis between *Candidatus* Patescibacteria/candidate phyla radiation (CPR) and**  
3 **methanogenic archaea in anaerobic ecosystems**

4  
5 Kyohei Kuroda<sup>1\*</sup>, Meri Nakajima<sup>1,2¶</sup>, Ryosuke Nakai<sup>1</sup>, Yuga Hirakata<sup>3</sup>, Shuka Kagemasa<sup>1,4,5</sup>,  
6 Kengo Kubota<sup>5,6</sup>, Taro Q.P. Noguchi<sup>7</sup>, Kyosuke Yamamoto<sup>1</sup>, Hisashi Satoh<sup>2</sup>, Masaru K.  
7 Nobu<sup>3,8</sup>, Takashi Narihiro<sup>1\*</sup>

8  
9 <sup>1</sup>Bioproduction Research Institute, National Institute of Advanced Industrial Science and  
10 Technology (AIST), 2-17-2-1 Tsukisamu Higashi, Toyohira-ku, Sapporo, Hokkaido,  
11 062-8517 Japan

12 <sup>2</sup>Division of Environmental Engineering, Faculty of Engineering, Hokkaido University,  
13 North-13, West-8, Hokkaido, 060-8628 Japan

14 <sup>3</sup>Bioproduction Research Institute, National Institute of Advanced Industrial Science and  
15 Technology (AIST), Central 6, Higashi 1-1-1, Tsukuba, Ibaraki 305-8566, Japan

16 <sup>4</sup>Department of Civil and Environmental Engineering, National Institute of Technology,  
17 Anan College, 265 Aoki Minobayashi, Anan, Tokushima 774-0017, Japan

18 <sup>5</sup>Department of Civil and Environmental Engineering, Graduate School of Engineering,  
19 Tohoku University, 6-6-06 Aza-Aoba, Aramaki, Aoba-ku, Sendai, Miyagi 980-8579, Japan

20 <sup>6</sup>Department of Frontier Sciences for Advanced Environment, Graduate School of  
21 Environmental Studies, Tohoku University, 6-6-06 Aza-Aoba, Aramaki, Aoba-ku, Sendai,  
22 Miyagi 980-8579, Japan

23 <sup>7</sup>Department of Chemical Science and Engineering, National Institute of Technology,  
24 Miyakonojo College, 473-1 Yoshio-cho, Miyakonojo, Miyazaki, 885-8567, Japan

25 <sup>8</sup>Institute for Extra-cutting-edge Science and Technology Avant-garde Research (X-star),  
26 Japan Agency for Marine-Earth Science and Technology (JAMSTEC), 2-15 Natsushima-cho,  
27 Yokosuka, Kanagawa 237-0061, Japan

28

29 <sup>¶</sup>These authors contributed equally to this work.

30 \* Co-corresponding authors:

31 Kyohei Kuroda, Tel: +81 11 857 8402; E-mail: k.kuroda@aist.go.jp

32 Takashi Narihiro, Tel: +81 29 861 9443; E-mail: t.narihiro@aist.go.jp

33 **Abstract**

34 To verify the parasitic lifestyle of *Candidatus* Patescibacteria in the enrichment  
35 cultures derived from a methanogenic bioreactor, we applied multifaceted approaches  
36 combining cultivation, microscopy, metatranscriptomic, and protein structure prediction  
37 analyses. Cultivation experiments with the addition of exogenous methanogenic archaea with  
38 acetate, amino acids, and nucleoside monophosphates and 16S rRNA gene sequencing  
39 confirmed the increase in the relative abundance of *Ca.* Patescibacteria and methanogens.  
40 The predominant *Ca.* Patescibacteria were *Ca.* Yanofskybacteria and 32-520 lineages (to  
41 which belongs to class *Ca.* Paceibacteria) and positive linear relationships ( $r^2 \geq 0.70$ )  
42 between the relative abundance of *Ca.* Yanofskybacteria and *Methanothrix*, suggesting that  
43 the tendency of the growth rate is similar to that of the host. By fluorescence *in situ*  
44 hybridization (FISH) observations, the FISH signals of *Methanothrix* and *Methanospirillum*  
45 cells with *Ca.* Yanofskybacteria and with 32-520 lineages, respectively, were significantly  
46 lower than those of the methanogens without *Ca.* Patescibacteria, suggesting their parasitic  
47 interaction. The TEM and SEM observations also support parasitism in that the cell walls and  
48 plugs of these methanogens associated with submicron cells were often deformed. In  
49 particular, some *Methanothrix*-like filamentous cells were dented where the submicron cells  
50 were attached. Metatranscriptomic and protein structure prediction analyses identified highly  
51 expressed secreted genes from the genomes of *Ca.* Yanofskybacteria and 32-520, and these  
52 genes contain adhesion-related domains to the host cells. Considering the results through the  
53 combination of microscopic observations, gene expression, and computational protein  
54 modeling, we propose that the interactions between *Ca.* Yanofskybacteria and 32-520  
55 belonging to class *Ca.* Paceibacteria and methanogenic archaea are parasitism.

56

57

58    Keywords: Candidate Phyla Radiation (CPR), *Candidatus* Patescibacteria, cross-domain  
59    symbiosis, *Candidatus* Yanofskybacteria/UBA5738, 32-520/UBA5633, scanning electron  
60    microscopy (SEM), transmission electron microscopy (TEM), metatranscriptomic analysis  
61  
62

63 **Main text**

64 Candidate phyla radiation (CPR)/*Candidatus* Patescibacteria, ultrasmall bacteria, is a  
65 major lineage of the domain Bacteria that is widely distributed in various natural and  
66 artificial environments (1–5). To date, several *Ca.* Patescibacteria-bacteria intradomain  
67 symbioses have been observed (*e.g.*, *Ca.* Saccharimonadia with Actinobacteria (6, 7) and *Ca.*  
68 Gracilibacteria with Gammaproteobacteria (8, 9). Most recently, three cases of cross-domain  
69 symbioses between the class *Ca.* Paceibacteria (former Parcubacteria/OD1) of the *Ca.*  
70 Patescibacteria and domain Archaea have been reported by using cultivation and microscopic  
71 observations, *i.e.*, *Ca.* Yanofskybacteria/UBA5738 (10) and *Ca.* Nealsonbacteria (11) with  
72 acetoclastic methanogenic archaeon *Methanothrix* and 32-520/UBA5633 with the  
73 hydrogenotrophic methanogen *Methanospirillum* (12). Our previous microscopic  
74 observations suggested that the interactions between *Ca.* Paceibacteria and methanogenic  
75 archaea are likely to cause parasitism, based on the absence or low detectable ribosomal  
76 activity (based on fluorescence *in situ* hybridization [FISH]) and deformations at the  
77 attachment sites (based on transmission electron microscopy [TEM]) (10, 12). In addition,  
78 several genetic features that may contribute to parasitism have been identified in the  
79 metagenome-assembled genomes of *Ca.* Paceibacteria (10–12); however, the challenge is to  
80 maintain enrichment cultures to ensure that those genes are expressed. In the present study, to  
81 uncover the underlying mechanisms of parasitic interactions between *Ca.* Paceibacteria and  
82 methanogens, we attempted to perform a multifaceted approach combining cultivation and  
83 microscopy along with metatranscriptomic analyses for enrichment cultures derived from  
84 anaerobic bioreactors.

85

86 To set up the experimental design for these analyses, we prepared seven parallel  
87 enrichment cultures (called C-1–C-7) transferred from the culture system C-d2-d1 (10),

88 which contains acetate, amino acids, and nucleoside monophosphates as potential growth  
89 factors for *Ca. Patescibacteria* (see Text S1). The enrichment cultures showed the production  
90 of methane gas on Days 14 and 31. We then analyzed the microbial community structures by  
91 using 16S rRNA gene amplicon sequencing on Days 7, 14, 21, and 31. The abundances of *Ca.*  
92 *Yanofskybacteria* OTU0011 (PMX\_810\_sub as the metagenomic bin), 32-520 OTU 0014  
93 (PMX.108), and 32-520 OTU0072 (PMX.50) (Fig. S1A and S1B) during cultivation varied  
94 from 0.15–12.5%, 0.6–2.3%, and 0.1–0.87%, respectively (Fig. S2A–S2D and Text S1).

95

96 The physiological and morphological characteristics of the symbioses were confirmed  
97 by microscopic observations based on fluorescence *in situ* hybridization (FISH), TEM, and  
98 scanning electron microscopy (SEM). On Day 31, the FISH fluorescence of *Methanothrix*  
99 filaments with more than 5 *Ca. Yanofskybacteria* cells was significantly lower than that of  
100 *Methanothrix* cells without *Ca. Yanofskybacteria* cells because of the significantly larger  
101 areas with no fluorescence (Fig. 1A,  $p < 0.05$ ). In addition, the fluorescence fractions (clear,  
102 weak, and no fluorescence) of the *Methanothrix* filaments also showed that many of the *Ca.*  
103 *Yanofskybacteria* cells ( $35 \pm 25$  cells/*Methanothrix*-filamentous) were attached to  
104 *Methanothrix* with no fluorescence on Day 31 (Fig. 1B and 1D, Figs. S3A, and S4).  
105 *Methanospirillum* cells with 32-520 cells ( $1.1 \pm 0.3$ – $1.3 \pm 0.5$  cells/*Methanospirillum*-cell, Fig.  
106 S3B) also had significantly lower FISH signals than *Methanospirillum* cells without 32-520  
107 (Fig. 1C and Fig. S5,  $p < 0.05$ ). Taken together, the interactions between methanogenic  
108 archaea and *Ca. Paceibacteria* are parasitic, strongly supporting previous predictions with  
109 statistical evidence (10, 12). The TEM observations also supported the parasitism of *Ca.*  
110 *Yanofskybacteria*, as the cell walls of *Methanothrix* (sheathed filamentous cells) (13) were  
111 often deformed where the submicron cells were attached. Interestingly, some *Methanothrix*-  
112 like filamentous cells with submicron *Ca. Yanofskybacteria*-like cells were dented through

113 TEM observation (Fig. 1E–1H). In addition, the submicron cells produced adhesive materials  
114 at the attachment sites on the *Methanotherix* cells (Fig. 2A and 2B). Therefore, it is speculated  
115 that the secreted materials are important for the attachment of *Ca. Yanofskybacteria* cells to  
116 *Methanotherix* cells. Another type of submicron cell (likely 32-520 cells) was tightly attached  
117 to the plug structures of *Methanospirillum* (rod-shaped sheath cells) (Fig. 2C and 2D) (14).  
118 The TEM observations indicated that there are extracellular substances at the attachment sites  
119 of 32-520-like submicron cells (Fig. 1I and 1J). These microscopic observations imply that  
120 the production of extracellular substances is essential for the episybiosis of *Ca.*  
121 *Pateibacteria*. High-resolution imaging techniques such as cryo-electron microscopy can be  
122 an effective approach to further clarify their cellular structures and attachment sites.

123

124 To confirm their interactions based on gene expression levels, we performed  
125 metatranscriptomics for the enrichment cultures on Days 14 (triplicate) and 31 (duplicate). A  
126 total of 6.0–10.8 Gb sequences were obtained and mapped to the previously reconstructed  
127 metagenome-assembled bins of *Ca. Yanofskybacteria*/UBA5738 (PMX\_810\_sub) and 32-  
128 520/UBA5633 (PMX.108 and PMX.50), which belonged to MWCK01 and UBA5633 at the  
129 genus level in the GTDB database (15), respectively (Fig. S1B and Text S1) (10)(12).  
130 Previous studies have suggested that the competence protein ComEC, secretion systems,  
131 pilus, and several transporters are important for the symbiosis of ultrasmall microbes,  
132 including *Ca. Pateibacteria*, with hosts (16–19). Accordingly, these genes were highly  
133 expressed in the genome of *Ca. Yanofskybacteria* PMX\_810\_sub on Day 14 (Table S4),  
134 suggesting their importance in symbiotic lifestyles during the early growth stage. In addition,  
135 F-type H<sup>+</sup>-transporting ATPase proteins were highly expressed in *Ca. Yanofskybacteria* and  
136 32-520 PMX.50 (Tables S2 and S4), which are encoded by type IV pilus assembly proteins  
137 (Table S2). In a previous study, ATPase and type IV pili were predicted to function in

138 attachment and motility on larger host surfaces (19). Furthermore, some active peptidase-like  
139 proteins with signal peptides (PMX\_810\_sub\_00385, PMX\_810\_sub\_00508,  
140 PMX.108\_00125, PMX.108\_00310, PMX.108\_00457, PMX.108\_00476, and  
141 PMX.50\_00413) (Table S2) and substrate-binding proteins of amino acid/metal transport  
142 systems were found in the three *Ca. Patescibacteria* genomes (Table S4). Although the  
143 detailed functions remain unclear, the addition of external sources of amino acids and trace  
144 elements may be key factors for the successful enrichment of *Ca. Patescibacteria*.

145

146 To estimate the function of the proteins encoded by the five most highly expressed  
147 but functionally unknown genes with signal peptides, including peptidoglycan binding  
148 domains (PGBD: PMX\_810\_sub\_00350, PMX.50\_00411, and PMX.108\_00302),  
149 immunoglobulin (Ig)-like folds (PMX\_810\_sub\_00465, PMX108\_00787, and  
150 PMX.108\_01191), galactose-binding domain folds (PMX.50\_00003), thioredoxin-like  
151 domains (PMX.108\_00787), polycystic kidney disease (PKD) domains (PMX.108\_01191),  
152 and type IV secretion system pilins (PMX.108\_00341, PMX.50\_00571, PMX.50\_00607,  
153 and PMX.50\_00608), the protein structures were predicted computationally (Fig. 2F and  
154 Table S2). These domains are known to be host adhesion-related proteins, such as membrane-  
155 anchored secreted proteins that bind membrane substrates (20–22). Of these, PGBD is found  
156 at the N- or C-terminus of several enzymes involved in cell wall degradation (*e.g.*,  
157 membrane-bound lytic murein transglycosylase B and zinc-containing D-alanyl-D-alanine-  
158 cleaving carboxypeptidase) (23). Interestingly, the PGBD-containing enzymes showed  
159 relatively similar structures among the three *Ca. Patescibacteria* (Fig. 2F), suggesting that  
160 these secreted uncharacterized proteins are likely to be specific and important for *Ca.*  
161 *Patescibacteria*-methanogen interactions.

162



163           In summary, we found that the interactions between the class *Ca. Paceibacteria* of *Ca.*  
164 *Patescibacteria* and methanogenic archaea are parasitism through the combination of FISH,  
165 TEM, and SEM observations and the first successful gene expression analysis of class *Ca.*  
166 *Paceibacteria*. In addition, we identified highly expressed secreted proteins with PGBD that  
167 have similar structures among three *Ca. Paceibacteria*. The microscopic and  
168 metatranscriptomic observations suggested that the adhesion/degradation functions of *Ca.*  
169 *Paceibacteria* to host methanogen cells are uniquely developed for their parasitic lifestyle.  
170 Further elucidation of the characterizations of the cell-cell interactions in detail and the  
171 establishment of refined cocultures of *Ca. Paceibacteria* and methanogens are essential to  
172 clarify the influence of ultrasmall bacteria on anaerobic ecosystems.

173

174

## 175 **Acknowledgments**

176 This study was partly supported by the Japan Society for the Promotion of Science  
177 KAKENHI JP16H07403 and JP21H01471, a matching fund between the National Institute of  
178 Advanced Industrial Science and Technology (AIST) and Tohoku University, and research  
179 grants from the Institute for Fermentation, Osaka (G-2019-1-052 and G-2022-1-014). The  
180 authors thank Riho Tokizawa, Yuki Ebara, Tomoya Ikarashi, and Maho Takai at AIST for  
181 technical assistance.

182

## 183 **Contributions**

184 K. Kuroda and T.N. designed this study. K. Kuroda and M.N. performed sampling,  
185 cultivation, microscopy, and sequence analysis. K. Kuroda, M.N., R.N., Y.H., S.K., K.  
186 Kubota, T.Q.P.N., K.Y., H.S., M.K.N., and T.N. interpreted the data. K. Kuroda, M.N., and

187 T.N. wrote the manuscript with input from all coauthors. All authors have read and approved  
188 the manuscript submission.

189

### 190 **Conflict of Interest**

191 The authors declare no conflicts of interest.

192

### 193 **References**

- 194 1. Jaffe AL, Castelle CJ, Banfield JF. 2023. Habitat Transition in the Evolution of  
195 Bacteria and Archaea. *Annu Rev Microbiol* 77:193–212.
- 196 2. Rinke C, Schwientek P, Sczyrba A, Ivanova NN, Anderson IJ, Cheng J-F, Darling A,  
197 Malfatti S, Swan BK, Gies E a., Dodsworth J a., Hedlund BP, Tsiamis G, Sievert SM,  
198 Liu W-T, Eisen J a., Hallam SJ, Kyrpides NC, Stepanauskas R, Rubin EM,  
199 Hugenholtz P, Woyke T. 2013. Insights into the phylogeny and coding potential of  
200 microbial dark matter. *Nature* 499:431–437.
- 201 3. Brown CT, Hug LA, Thomas BC, Sharon I, Castelle CJ, Singh A, Wilkins MJ,  
202 Wrighton KC, Williams KH, Banfield JF. 2015. Unusual biology across a group  
203 comprising more than 15% of domain Bacteria. *Nature* 523:208–211.
- 204 4. Naud S, Ibrahim A, Valles C, Maatouk M, Bittar F, Tidjani Alou M, Raoult D. 2022.  
205 Candidate Phyla Radiation, an Underappreciated Division of the Human Microbiome,  
206 and Its Impact on Health and Disease. *Clin Microbiol Rev* 35:375–384.
- 207 5. Kuroda K, Narihiro T, Shinshima F, Yoshida M, Yamaguchi H, Kurashita H,  
208 Nakahara N, Nobu MK, Noguchi TQP, Yamauchi M, Yamada M. 2022. High-rate  
209 cotreatment of purified terephthalate and dimethyl terephthalate manufacturing  
210 wastewater by a mesophilic upflow anaerobic sludge blanket reactor and the microbial  
211 ecology relevant to aromatic compound degradation. *Water Res* 219:118581.

- 212 6. He X, McLean JS, Edlund A, Yooseph S, Hall AP, Liu SY, Dorrestein PC, Esquenazi  
213 E, Hunter RC, Cheng G, Nelson KE, Lux R, Shi W. 2015. Cultivation of a human-  
214 associated TM7 phylotype reveals a reduced genome and epibiotic parasitic lifestyle.  
215 Proc Natl Acad Sci U S A 112:244–249.
- 216 7. Batinovic S, Rose JJA, Ratcliffe J, Seviour RJ, Petrovski S. 2021. Cocultivation of an  
217 ultrasmall environmental parasitic bacterium with lytic ability against bacteria  
218 associated with wastewater foams. Nat Microbiol 6:703–711.
- 219 8. Moreira D, Zivanovic Y, López-Archilla AI, Iniesto M, López-García P. 2021.  
220 Reductive evolution and unique predatory mode in the CPR bacterium *Vampirococcus*  
221 *lugosii*. Nat Commun 12:2454.
- 222 9. Yakimov MM, Merkel AY, Gaisin VA, Pilhofer M, Messina E, Hallsworth JE,  
223 Klyukina AA, Tikhonova EN, Gorlenko VM. 2022. Cultivation of a vampire:  
224 ‘*Candidatus Absconditicoccus praedator*.’ Environ Microbiol 24:30–49.
- 225 10. Kuroda K, Yamamoto K, Nakai R, Hirakata Y, Kubota K, Nobu MK, Narihiro T. 2022.  
226 Symbiosis between *Candidatus Patescibacteria* and Archaea Discovered in  
227 Wastewater-Treating Bioreactors. MBio 13:e0171122.
- 228 11. Chen X, Molenda O, Brown CT, Toth CRA, Guo S, Luo F, Howe J, Nesbø CL, He C,  
229 Montabana EA, Cate JHD, Banfield JF, Edwards EA. 2023. “*Candidatus*  
230 *Nealsonbacteria*” Are Likely Biomass Recycling Ectosymbionts of Methanogenic  
231 Archaea in a Stable Benzene-Degrading Enrichment Culture. Appl Environ Microbiol  
232 89.
- 233 12. Kuroda K, Kubota K, Kagemasa S, Nakai R, Hirakata Y, Yamamoto K, Nobu MK,  
234 Narihiro T. 2022. Novel Cross-domain Symbiosis between *Candidatus Patescibacteria*  
235 and Hydrogenotrophic Methanogenic Archaea *Methanospirillum* Discovered in a  
236 Methanogenic Ecosystem. Microbes Environ 37:ME22063.

- 237 13. Touzel JP, Prensier G, Roustan JL, Thomas I, Dubourguier HC, Albagnac G. 1988.  
238 Description of a new strain of *Methanotherix soehngenii* and rejection of *Methanotherix*  
239 *concilii* as a synonym of *Methanotherix soehngenii*. *Int J Syst Bacteriol* 38:30–36.
- 240 14. Firtel M, Southam G, Harauz G, Beveridge TJ. 1993. Characterization of the cell wall  
241 of the sheathed methanogen *Methanospirillum hungatei* GP1 as an S layer. *J Bacteriol*  
242 175:7550–7560.
- 243 15. Chaumeil P-A, Mussig AJ, Hugenholtz P, Parks DH. 2022. GTDB-Tk v2: memory  
244 friendly classification with the genome taxonomy database. *Bioinformatics* 38:5315–  
245 5316.
- 246 16. Xie B, Wang J, Nie Y, Tian J, Wang Z, Chen D, Hu B, Wu X-L, Du W. 2022. Type IV  
247 pili trigger episymbiotic association of *Saccharibacteria* with its bacterial host. *Proc*  
248 *Natl Acad Sci* 119:2017.
- 249 17. McLean JS, Bor B, Kerns KA, Liu Q, To TT, Solden L, Hendrickson EL, Wrighton K,  
250 Shi W, He X. 2020. Acquisition and Adaptation of Ultra-small Parasitic Reduced  
251 Genome Bacteria to Mammalian Hosts. *Cell Rep* 32:107939.
- 252 18. Castelle CJ, Brown CT, Anantharaman K, Probst AJ, Huang RH, Banfield JF. 2018.  
253 Biosynthetic capacity, metabolic variety and unusual biology in the CPR and DPANN  
254 radiations. *Nat Rev Microbiol* 16:629–645.
- 255 19. Seymour CO, Palmer M, Becraft ED, Stepanauskas R, Friel AD, Schulz F, Woyke T,  
256 Eloë-Fadrosch E, Lai D, Jiao J-Y, Hua Z-S, Liu L, Lian Z-H, Li W-J, Chuvochina M,  
257 Finley BK, Koch BJ, Schwartz E, Dijkstra P, Moser DP, Hungate BA, Hedlund BP.  
258 2023. Hyperactive nanobacteria with host-dependent traits pervade Omnitrophota. *Nat*  
259 *Microbiol* 8:727–744.

- 260 20. Chatterjee S, Basak AJ, Nair A V., Duraivelan K, Samanta D. 2021. Immunoglobulin-  
261 fold containing bacterial adhesins: molecular and structural perspectives in host tissue  
262 colonization and infection. *FEMS Microbiol Lett* 368:1–14.
- 263 21. Nguyen VS, Spinelli S, Cascales É, Roussel A, Cambillau C, Leone P. 2021.  
264 Anchoring the T6SS to the cell wall: Crystal structure of the peptidoglycan binding  
265 domain of the TagL accessory protein. *PLoS One* 16:e0254232.
- 266 22. Capitani G, Rossmann R, Sargent DF, Grütter MG, Richmond TJ, Hennecke H. 2001.  
267 Structure of the soluble domain of a membrane-anchored thioredoxin-like protein from  
268 *Bradyrhizobium japonicum* reveals unusual properties. *J Mol Biol* 311:1037–1048.
- 269 23. Reid CW, Blackburn NT, Legaree BA, Auzanneau F-I, Clarke AJ. 2004. Inhibition of  
270 membrane-bound lytic transglycosylase B by NAG-thiazoline. *FEBS Lett* 574:73–79.
- 271 24. Jumper J, Evans R, Pritzel A, Green T, Figurnov M, Ronneberger O,  
272 Tunyasuvunakool K, Bates R, Žídek A, Potapenko A, Bridgland A, Meyer C, Kohl  
273 SAA, Ballard AJ, Cowie A, Romera-Paredes B, Nikolov S, Jain R, Adler J, Back T,  
274 Petersen S, Reiman D, Clancy E, Zielinski M, Steinegger M, Pacholska M,  
275 Berghammer T, Bodenstein S, Silver D, Vinyals O, Senior AW, Kavukcuoglu K,  
276 Kohli P, Hassabis D. 2021. Highly accurate protein structure prediction with  
277 AlphaFold. *Nature* 596:583–589.
- 278
- 279

280 **Figure legends**

281 **Figure 1** (A) Cell length proportions of clear and weak fluorescence of *Methanothrix*  
282 filamentous cells calculated based on the fluorescence *in situ* hybridization signals using the  
283 *Methanothrix*-targeting MX825-FITC probe and *Candidatus* Yanofskybacteria-targeting  
284 Pac\_683-Cy3 probe. The *Methanothrix* cells attached with > 5 *Ca.* Yanofskybacteria cells  
285 were chosen for calculation. (B) Proportions of detected *Ca.* Yanofskybacteria cells attached  
286 to the different fluorescence of *Methanothrix* cells: attached to *Methanothrix* filamentous  
287 cells with clear fluorescence, attached to *Methanothrix* with weak fluorescence, and attached  
288 to *Methanothrix* with no fluorescence. (C) The fluorescence of *Methanospirillum* cells with  
289 or without 32-520 cells. (D) FISH brightness of measured *Methanothrix* filamentous cells  
290 based on 8-bit grayscale images. (A)–(D) Different letters in the figure indicate significant  
291 differences among the values of the proportions based on Tukey’s test ( $p < 0.05$ ). (E)–(I)  
292 Transmission electron micrographs of small submicron cells attached to (E)–(H)  
293 *Methanothrix*-like cells and (I) and (J) *Methanospirillum*-like cells in culture system C-1 on  
294 Day 33. Orange arrows indicate extracellular substances at the attachment sites.

295

296 **Figure 2** (A)–(D) Scanning electron micrographs of small submicron cells (yellow arrows)  
297 attached to (A) and (B) *Methanothrix*-like cells and (C) and (D) *Methanospirillum*-like cells  
298 in culture system C-1 on Day 33. White arrows indicate extracellular substances at the  
299 attachment sites. (E) Gene expression heatmap of the five most highly expressed genes with  
300 signal peptides in the genome of *Candidatus* Yanofskybacteria/UBA5738 (PMX.810\_sub)  
301 and 32-520/UBA5633 (PMX.50 and PMX.108) in culture systems C-2–C-4 on Day 14 and  
302 C-6 and C-7 on Day 31. The color scale from white to orange shows the gene expression  
303 level based on the normalized RPKM value (see Text S1). “Days 31/14” indicates the  
304 difference in gene expression between Days 31 and 14. (F) Predicted protein structures of the

305 highly expressed genes of *Ca. Patescibacteria* using the AlphaFold2 software package (24).

306 The overlaying domain was predicted through the InterPro database

307 (<http://www.ebi.ac.uk/interpro/>). PGBD, Ig-like, and PKD are the peptidoglycan binding

308 domain, immunoglobulin-like domain, and polycystic kidney disease domain, respectively.

309

310 **Legends of Supplemental materials**

311 **Supporting Information** The file containing materials and methods and results and  
312 discussion.

313 **Figure S1** Phylogenetic trees of order *Candidatus* Paceibacterales based on (A) 16S rRNA  
314 gene sequences and (B) concatenated phylogenetic marker genes of GTDBtk 2.0.0 (ver. r207)  
315 (15). The phylogenetic positions of the metagenomic bins PMX\_810 and PMX.108/PMX.50  
316 are shown in pink and blue, respectively. The 16S rRNA gene-based tree was constructed  
317 using the neighbor-joining method. Sequences that match the Pac\_683 and 32-520-1066  
318 probes are shown in yellow and blue layers, respectively.

319 **Figure S2** (A) Relative abundance of predominant *Candidatus* Patescibacteria and  
320 methanogenic archaea in the culture systems based on 16S rRNA gene sequencing. (B)–(D)  
321 Linear regression analysis between predominant methanogens and *Ca.* Patescibacteria based  
322 on 16S rRNA gene-based relative abundance. (B) *Methanotherix* OTU0004 and *Ca.*  
323 Yanofskybacteria OTU0011, (C) *Methanospirillum* OTU0025 and 32-520 OTU0014, and (D)  
324 *Methanospirillum* OTU0025 and 32-520 OTU0072.

325 **Figure S3** (A) Number of *Candidatus* Yanofskybacteria cells attached to one *Methanotherix*  
326 filamentous cell on Days 14 and 31. (B) Number of 32-520 cells attached to one  
327 *Methanospirillum* cell on Days 14 and 31. The statistical analysis was performed based on  
328 Welch's t test.

329 **Figure S4** Micrographs of (A) and (E) phase-contrast, (B) and (F) 4',6-diamidino-2-  
330 phenylindole dihydrochloride staining, (C), (D), (G), and (H) fluorescence *in situ*  
331 hybridization obtained from the culture system C-1 on (A)–(D) Days 14 and (G)–(H) 31. (C)  
332 and (G) *Ca.* Yanofskybacteria-targeting Pac\_683-Cy3 probe and (D) and (H) *Methanotherix*-  
333 targeting MX825-FITC probe.



334 **Figure S5** Micrographs of (A) and (E) phase-contrast, (B) and (F) 4',6-diamidino-2-  
335 phenylindole dihydrochloride (DAPI) staining, (C), (D), (G), and (H) fluorescence *in situ*  
336 hybridization obtained from the culture system C-1 on (A)–(D) Days 14 and (G)–(H) 31. (C)  
337 and (G) 32-520-targeting 32-520-1066-Cy3 probe and (D) and (H) Archaea-targeting  
338 ARC915-FITC probe. Yellow arrows indicate FISH-detectable 32-520 cells. Light blue  
339 arrows indicate unspecific FISH signals that were not observed by phase-contrast and DAPI  
340 staining. Dashed white lines indicate weak or no FISH signals of *Methanospirillum*-like cells.  
341

342 **Table S1** Mapped and total sequence reads of the metatranscriptome in this study.

343 **Table S2** Summary of the gene expression level and annotation of metagenomic bins of  
344 *Candidatus* Yanofskybacteria/UBA5738 (PMX\_810\_sub) and 32-520/UBA5633 (PMX.50  
345 and PMX.108) using DRAM, BlastKOALA, and SignalP annotation software.

346 **Table S3** Summary of the gene expression level and annotation of metagenomic bins of  
347 *Methanotherix* (PMX.81, PMX.12, and PMX.35) and *Methanospirillum* (PMX.141\_sub) using  
348 DRAM, BlastKOALA, and SignalP annotation software.

349 **Table S4** Summary of the annotation of the secretion systems, transporter-related proteins,  
350 ATPase, and cell growth-related genes in the genome of *Candidatus*  
351 Yanofskybacteria/UBA5738 (PMX.810\_sub) and 32-520/UBA5633 (PMX.50 and PMX.108)  
352 in culture systems C-2–C-4 on Day 14 and C-6 and C-7 on Day 31.  
353

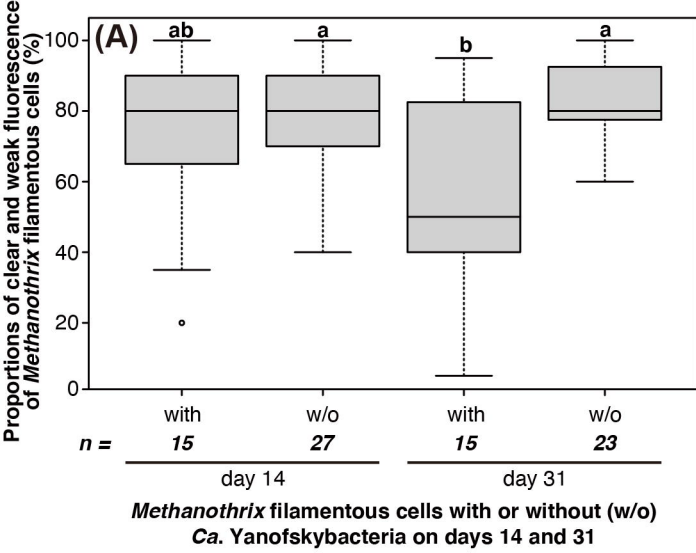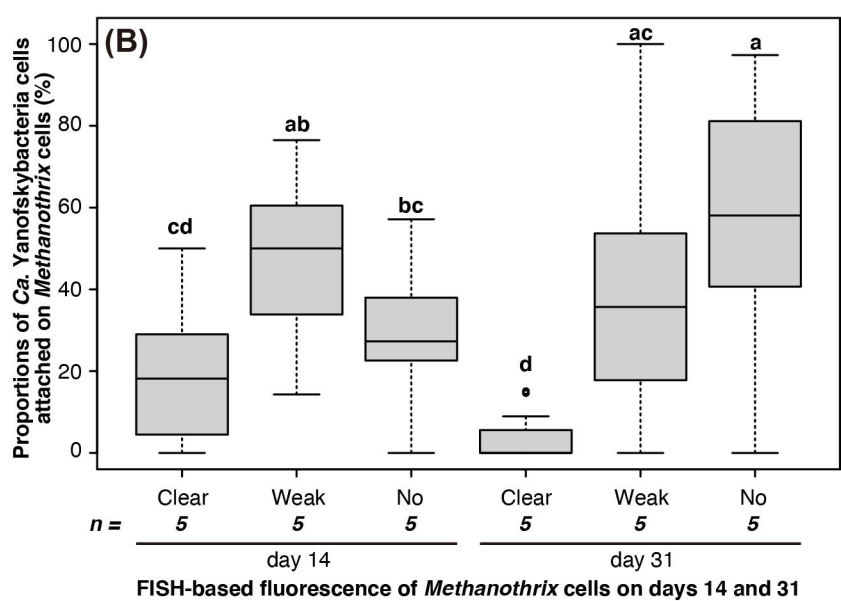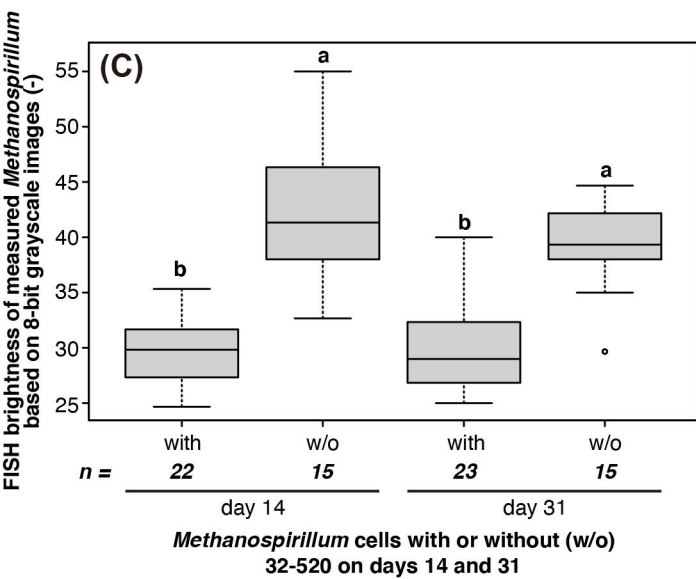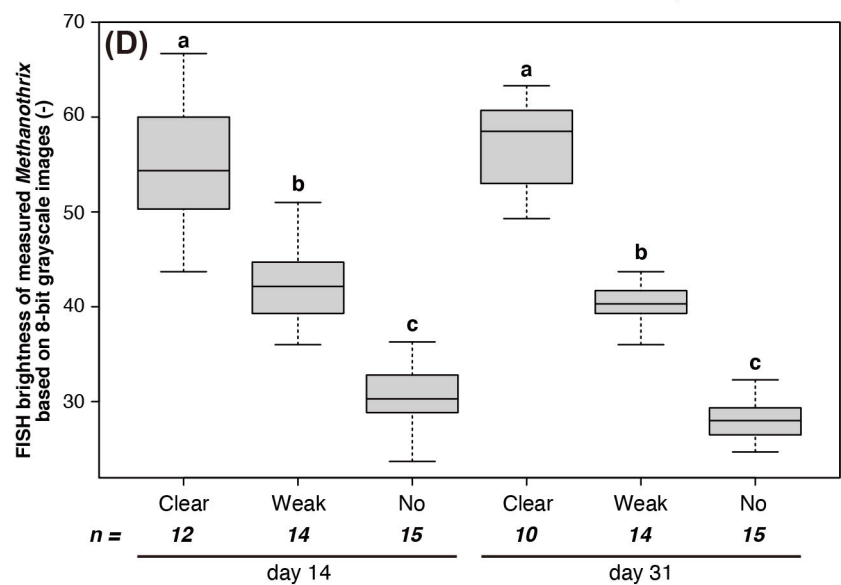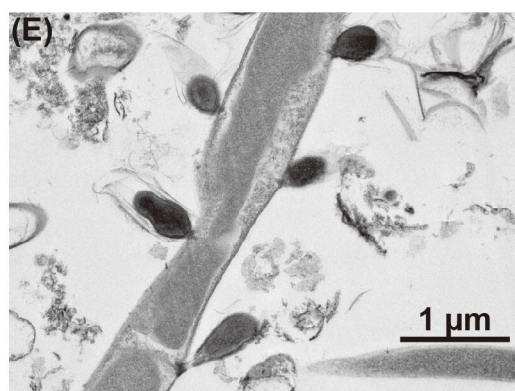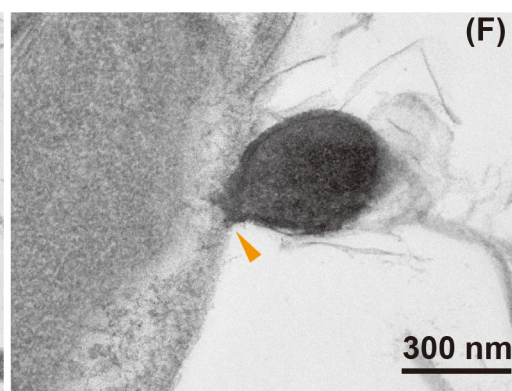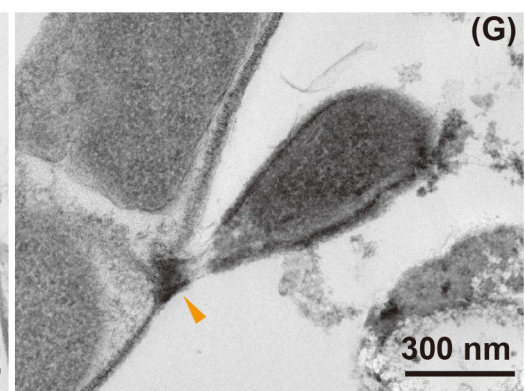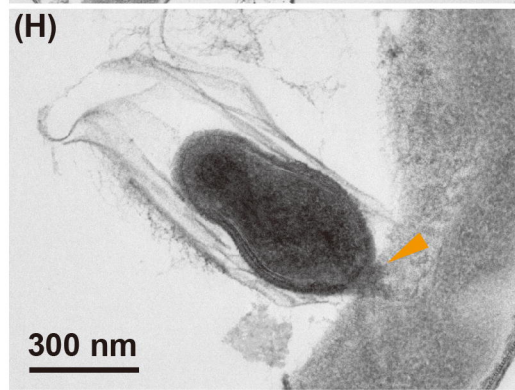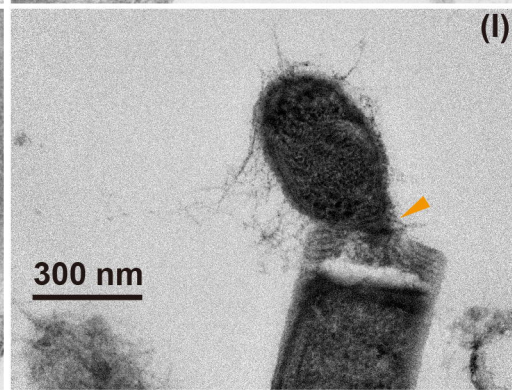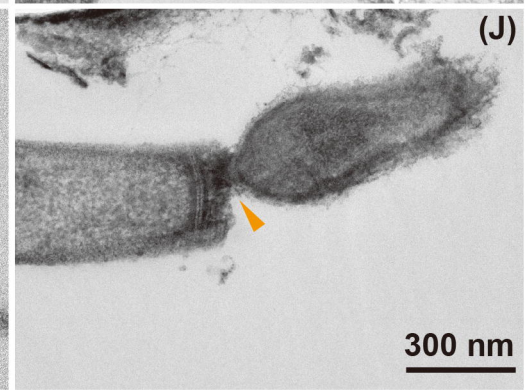

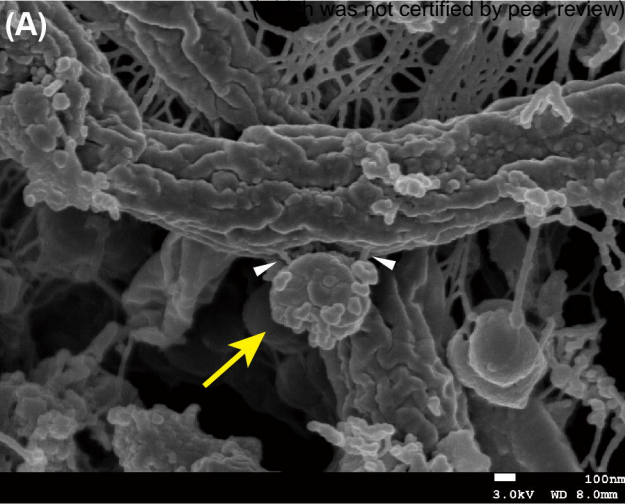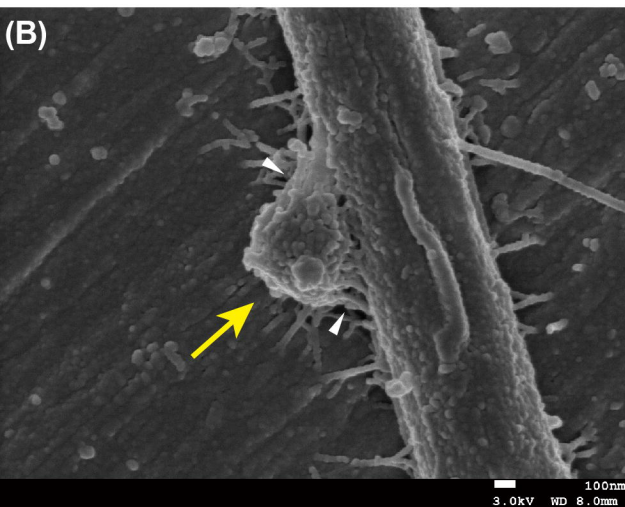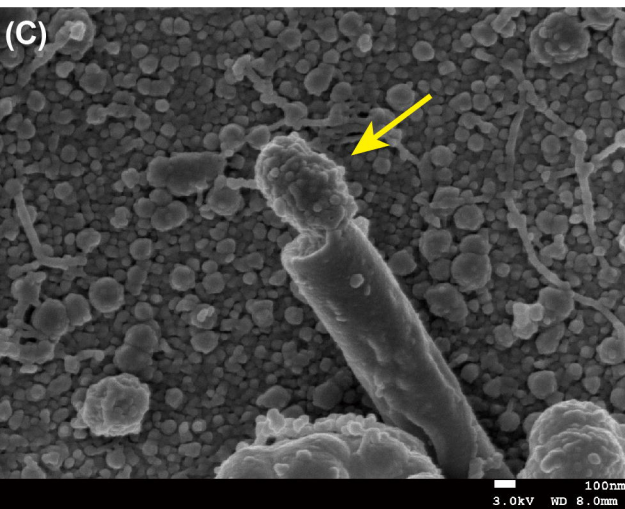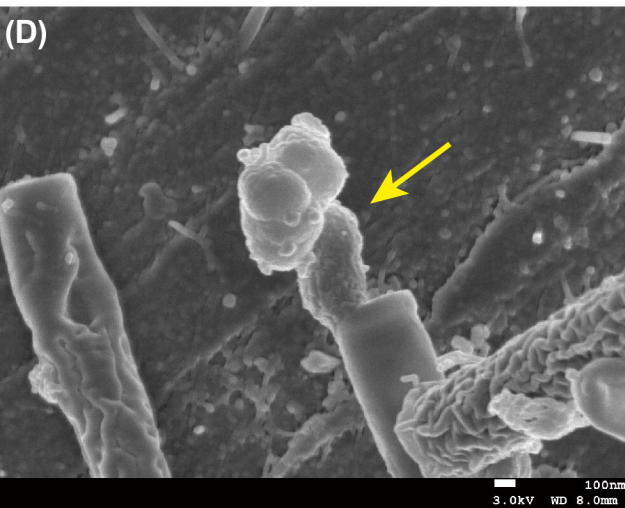

(E)

| Locus             | length (bp) | Gene expression level [ $\log_2(\text{RPKM}+1)$ ] |        |            |
|-------------------|-------------|---------------------------------------------------|--------|------------|
|                   |             | day 14                                            | day 31 | days 31/14 |
| PMX_810_sub_00350 | 2079        | 16.7                                              | 15.9   | -0.8       |
| PMX_810_sub_00356 | 1116        | 15.9                                              | 15.2   | -0.7       |
| PMX_810_sub_00650 | 591         | 15.0                                              | 15.0   | -0.1       |
| PMX_810_sub_00504 | 441         | 13.6                                              | 13.4   | -0.2       |
| PMX_810_sub_00811 | 408         | 13.4                                              | 16.3   | 2.9        |
| PMX_810_sub_00465 | 1320        | 12.9                                              | 13.9   | 1.0        |

|                       |      |      |      |      |
|-----------------------|------|------|------|------|
| PMX.108_01129         | 1083 | 11.5 | 12.2 | 0.6  |
| PMX.108_01191         | 1107 | 10.2 | 8.1  | -2.2 |
| PMX.108_00341 (pilin) | 300  | 9.9  | 0.0  | -9.9 |
| PMX.108_00302         | 3558 | 9.8  | 7.9  | -1.8 |
| PMX.108_00880         | 309  | 9.1  | 7.9  | -1.3 |
| PMX.108_00119         | 399  | 8.3  | 8.8  | 0.5  |
| PMX.108_00787         | 1278 | 0.0  | 8.1  | 8.1  |

|                      |      |      |      |      |
|----------------------|------|------|------|------|
| PMX.50_00411         | 3891 | 12.0 | 14.1 | 2.1  |
| PMX.50_00003         | 1254 | 11.3 | 13.6 | 2.4  |
| PMX.50_00607 (pilin) | 429  | 10.2 | 12.1 | 1.9  |
| PMX.50_00002         | 1362 | 10.2 | 13.7 | 3.5  |
| PMX.50_00571 (pilin) | 396  | 9.6  | 8.7  | -0.9 |
| PMX.50_00608 (pilin) | 339  | 9.4  | 11.8 | 2.4  |

(F)

|       |                          |                          |
|-------|--------------------------|--------------------------|
| locus | PMX_810_sub_00350 (blue) | PMX_810_sub_00465 (blue) |
|-------|--------------------------|--------------------------|

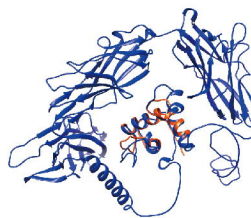

domain PGBD (orange)

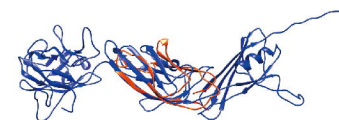

Ig-like fold (orange)

locus PMX.50\_00411 (blue)

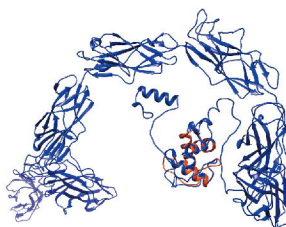

domain PGBD (orange)

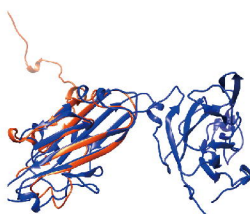

locus PMX.50\_00003 (blue)

Galactose-binding domain fold (orange)

locus PMX.108\_00302 (blue)

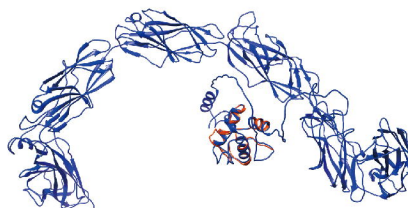

domain PGBD (orange)

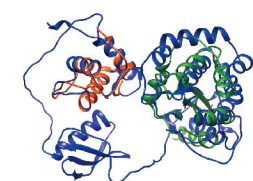

locus PMX108\_00787 (blue)

Ig-like fold (orange)  
Thioredoxin-like fold (green)

locus PMX.108\_01191 (blue)

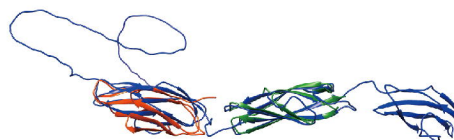

domain Ig-like fold (orange)  
PKD domain (green)
